# Supplementary material for: Synthesis, Characterization, Thermal Analysis, DFT, and Cytotoxicity of Palladium Complexes with Nitrogen-Donor Ligands
Source: MDPI journal article supplement (doi:10.3390/molecules27030964), 2022-01-31
Supplement: s1 [file s1]

## Supplementary materials

### -Contents-

Figure S1: UV-Vis spectra of a) [Pd(DABA)Cl<sub>2</sub>]; b) [Pd(CPDA)Cl<sub>2</sub>]; c) [Pd(hzpy)Cl<sub>2</sub>] complexes

Figure S2: Spectral data of the N,N diamino ligands and IR spectra of a) 3,4- diaminobenzoic acid (DABA); b) 4- chloro-o-phenylendiamino (CPDA); c) 2-hydrazinopyridine (hzpy)

Figure S3: HOMO-1, HOMO, LUMO, LUMO+1 MOs plots with the indication of the main orbital composition (%), for Pd(DABA)Cl<sub>2</sub> , Pd(CPCA)Cl<sub>2</sub> ,Pd(HZPY)Cl<sub>2</sub>, in the singlet ground state;

Figure S4: Computed Spectra in DMF at B3LYP/6-31+G(d,p)/SDD level of theory, for all the Pd-complexes

Figure S5: Occupied (NTOo) and virtual (NTOv) Natural Transition Orbitals of the main electronic transitions quoted as A1-A4 as reported in Figure S4

Figure S6: Optimized structures for the first and second hydrolysis processes of a) [Pd(DABA)Cl<sub>2</sub>]; b) [Pd(CPDA)Cl<sub>2</sub>]; c) [Pd(hzpy)Cl<sub>2</sub>] complexes, in water phase, at B3LYP/6-31+G(d,p)/SDD level of theory

Table S1: Selected bond lengths and angles for a) [Pd(DABA)Cl<sub>2</sub>]; b) [Pd(CPDA)Cl<sub>2</sub>]; c) [Pd(hzpy)Cl<sub>2</sub>] optimized complexes

Table S2: Cartesian coordinates of all the intermediates and transition states located along the hydrolysis free energy profiles, optimized in water phase at B3LYP/ 6-31+G(d,p)/SDD level of theory

**-Figure S1-**

**UV-Vis spectra recorded in DMF of a) [Pd(DABA)Cl<sub>2</sub>]; b) [Pd(CPDA)Cl<sub>2</sub>]; c) [Pd(hzpy)Cl<sub>2</sub>] complexes**

**a)**

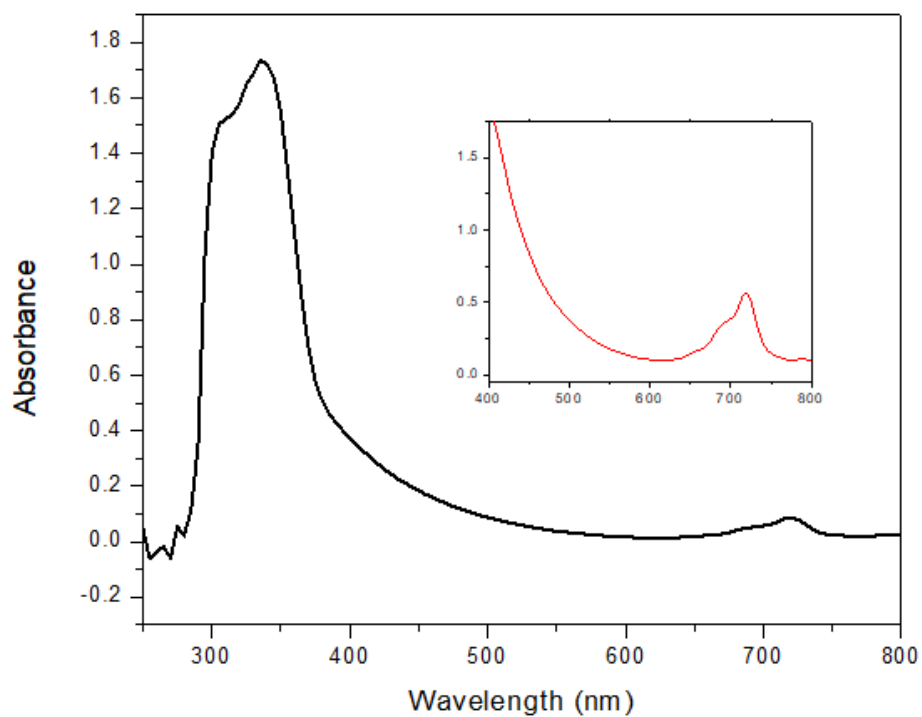

**b)**

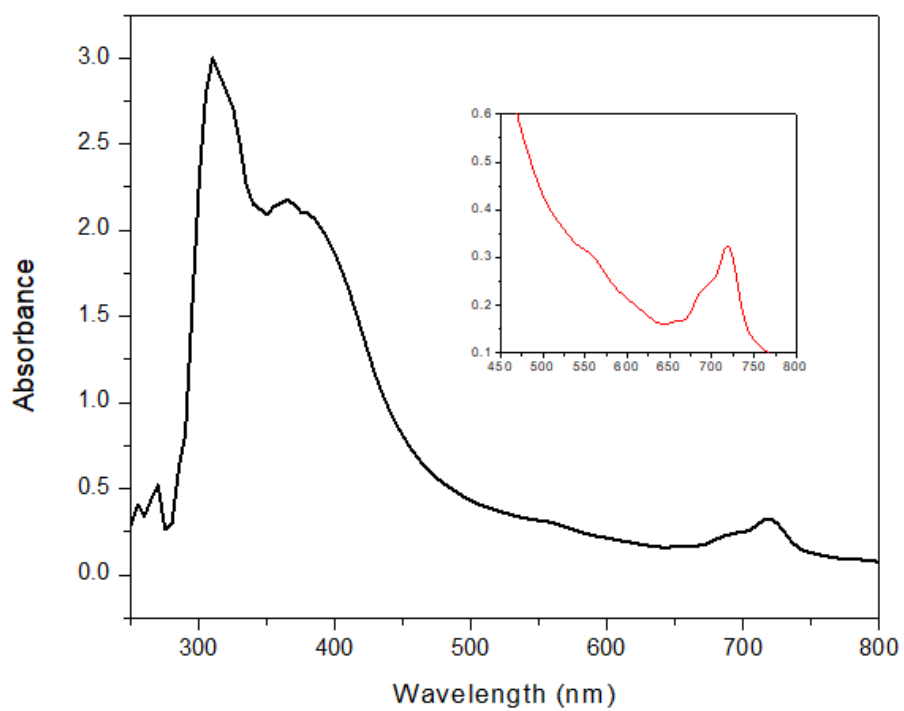

c)

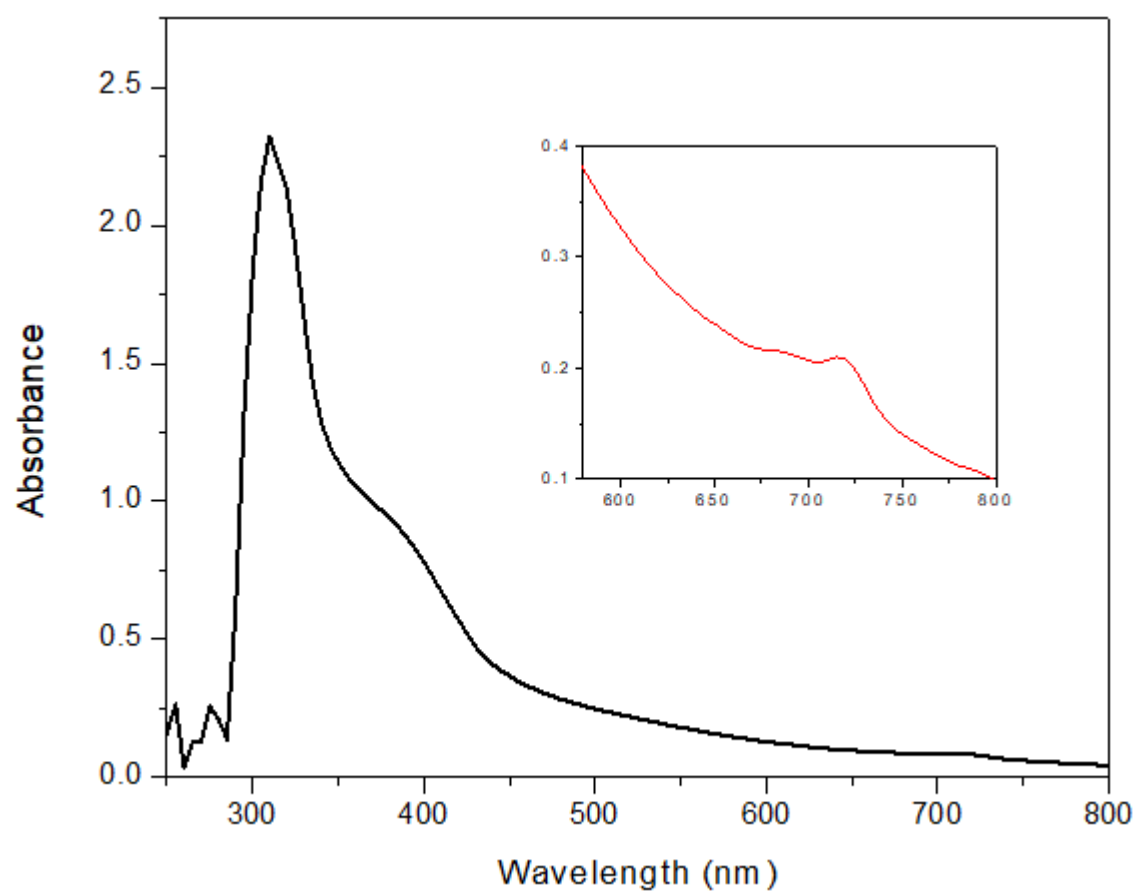

**-Figure S2-**

**Spectral data of the N,N diamino ligands and IR spectra of a) 3,4- diaminobenzoic acid (DABA); b) 4- chloro-o-phenyldiamino (CPDA); c) 2-hydrazinopyridine (hzpy)**

**a)**

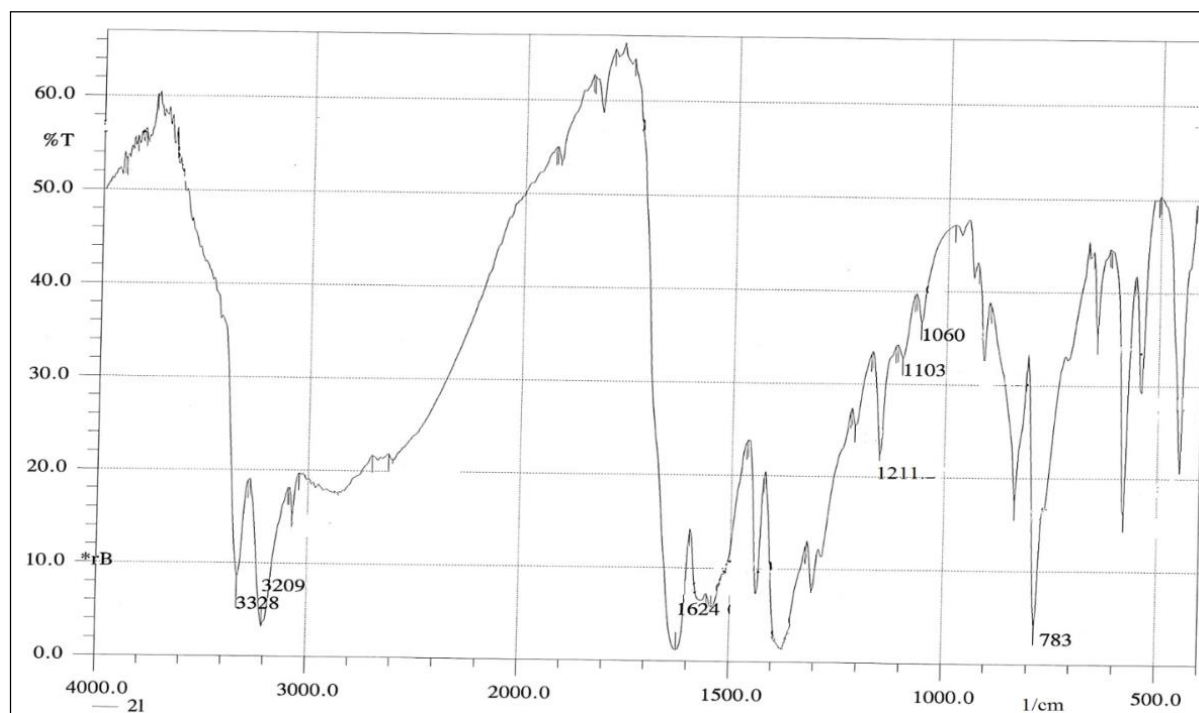

### **1.1.3,4- diaminobenzoic acid (DABA)**

The IR spectrum of the 3,4-diaminobenzoic acid (DABA) ligand; **Fig. S1a**, showed a characteristic band at 3328 cm<sup>-1</sup> and 3205 cm<sup>-1</sup> which were assigned to the stretching vibration of the NH<sub>2</sub> group. The deformation vibration of the NH<sub>2</sub> group were observed at 1211cm<sup>-1</sup> (ρt NH<sub>2</sub>), (ρw NH<sub>2</sub>), 1153 cm<sup>-1</sup> and 783 cm<sup>-1</sup> (ρr NH<sub>2</sub>). The spectrum showed also a strong peak at 1624 cm<sup>-1</sup> which was assigned to carbonyl group vibration (νC=O) effected by hydrogen bonding.

**b)**

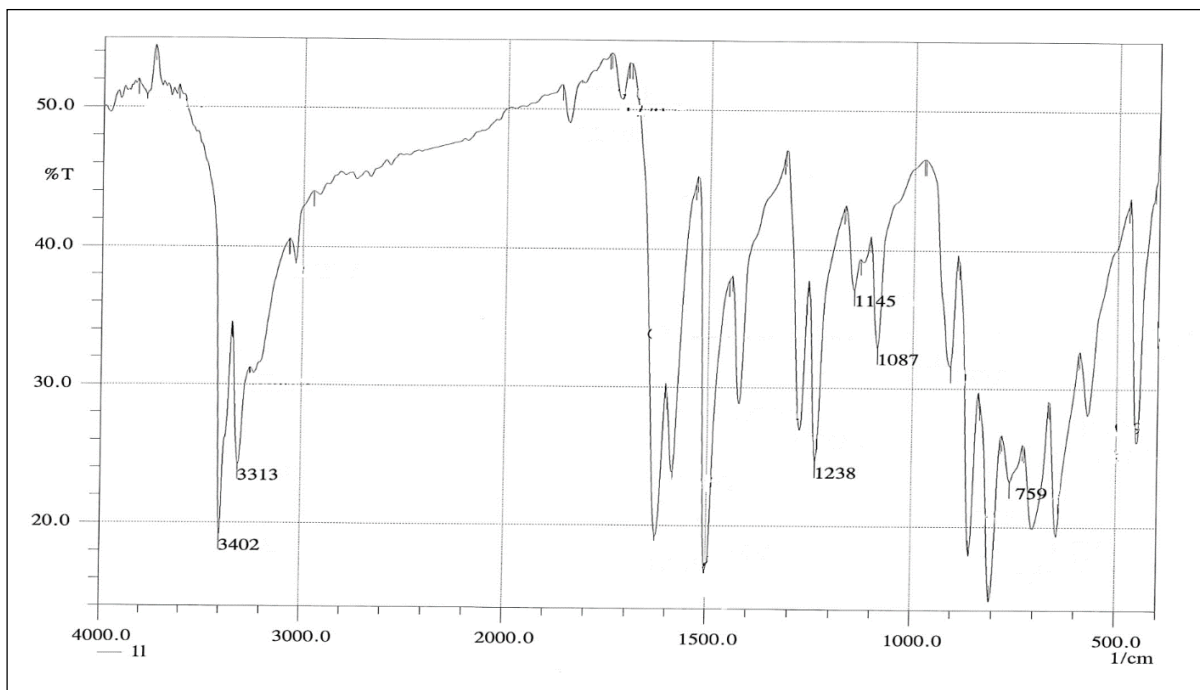

#### **1,2,4-chloro-o-phenyldiamino (CPDA)**

The IR spectrum of the 4-chloro-o-phenyldiamino (CPDA) ligand; **Fig. S1b**, showed a characteristic band at  $3402\text{ cm}^{-1}$  and  $3313\text{ cm}^{-1}$  which were assigned to the stretching vibration of the  $\text{NH}_2$  group. The deformation vibration of the  $\text{NH}_2$  group were observed at  $1276\text{ cm}^{-1}$  ( $\rho\text{t NH}_2$ ), ( $\rho\text{w NH}_2$ ),  $1145\text{ cm}^{-1}$  and  $795\text{ cm}^{-1}$  ( $\rho\text{rNH}_2$ ).

c)

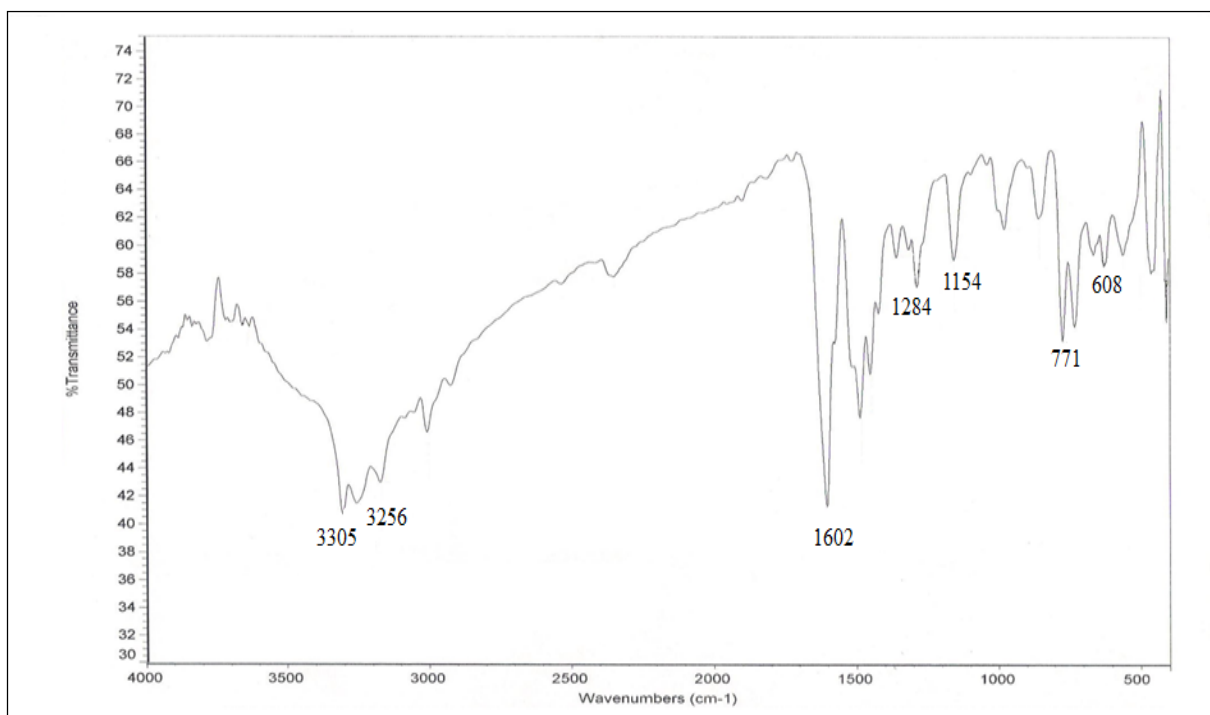

### 2-hydrizinyridine (hzpy)

The IR spectrum of the 2- hydrizinyridine (hzpy) ligand; **Fig. S1c**, showed a characteristic band at 3305 and 3256  $\text{cm}^{-1}$  which were assigned to the stretching vibration of the  $\text{NH}_2$  group. The deformation vibration of the  $\text{NH}_2$  group were observed at 1284  $\text{cm}^{-1}$  ( $\rho\text{t NH}_2$ ), ( $\rho\text{w NH}_2$ ), 1154  $\text{cm}^{-1}$  and 771  $\text{cm}^{-1}$  ( $\rho\text{rNH}_2$ ). The peak at 1602  $\text{cm}^{-1}$  may be assigned to the ( $\text{H}-\text{C}=\text{N}$ ) of the (py) ring. The pyridyl vibration (py) vibrations were at 608  $\text{cm}^{-1}$  (in-plane ring deformation) and at 406  $\text{cm}^{-1}$  (out-of-plane ring deformation).

**-Figure S3-**

**HOMO-1, HOMO, LUMO, LUMO+1 MOs plots with the indication of the main orbital composition (%), for Pd(DABA)Cl<sub>2</sub> , Pd(CPCA)Cl<sub>2</sub> ,Pd(HZPY)Cl<sub>2</sub>, in the singlet ground state**

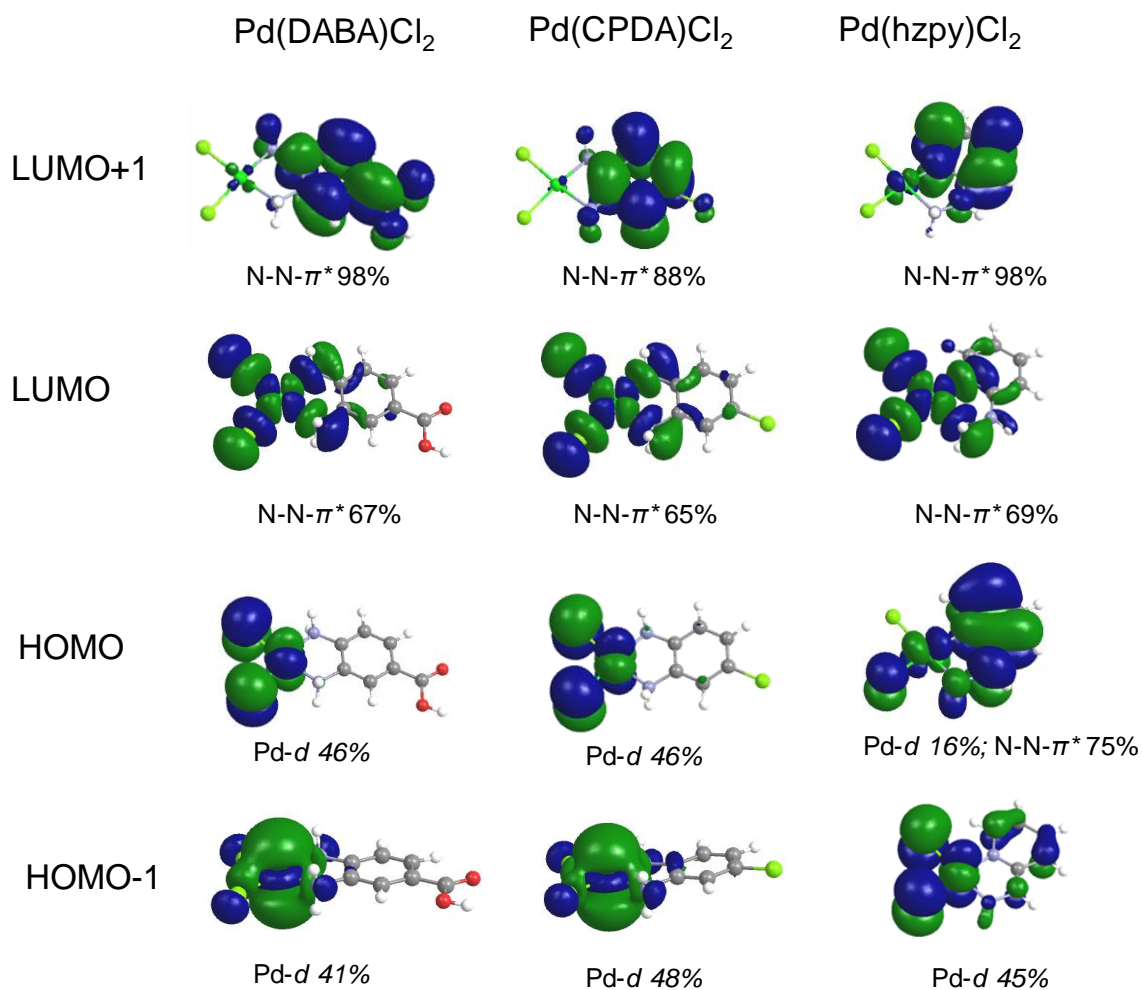

**-Figure S4-**

**Computed Spectra in DMF at B3LYP/6-31+G\*/SDD level of theory, for all the Pd-complexes**

**Pd(DABA)Cl<sub>2</sub>**

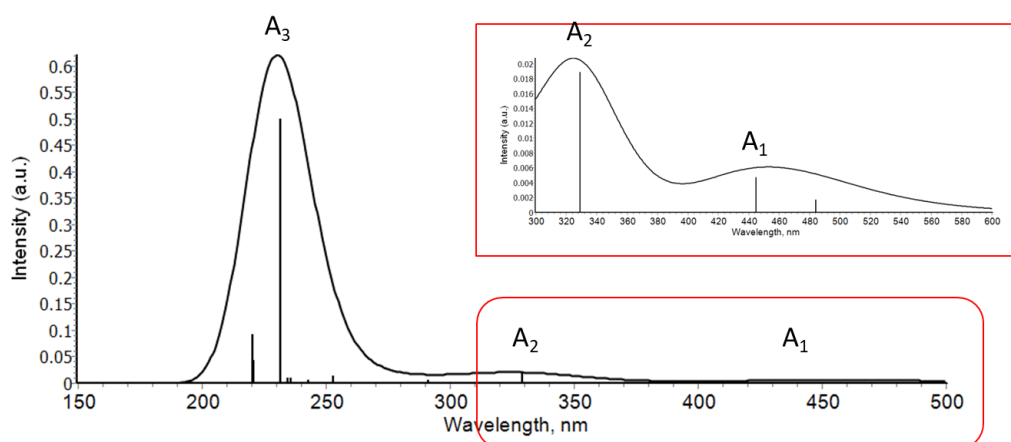

**Pd(CPDA)Cl<sub>2</sub>**

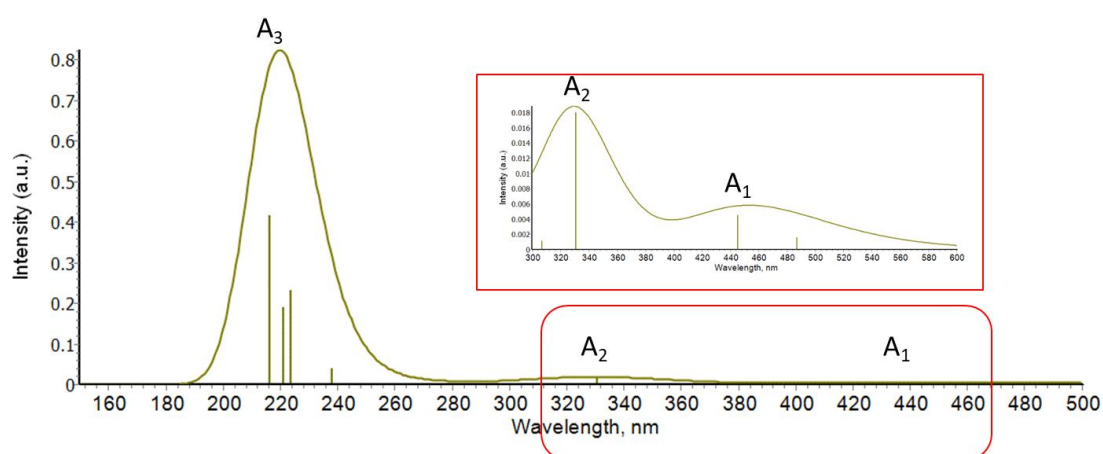

**Pd(hzpy)Cl<sub>2</sub>**

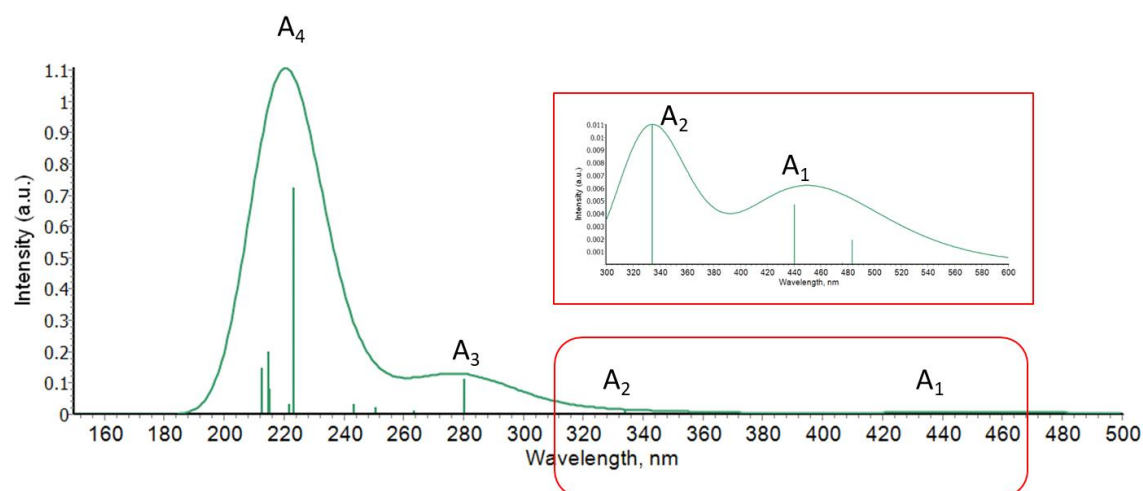



**-Figure S5-**

**Occupied (NTOo) and virtual (NTOv) Natural Transition Orbitals of the main electronic transitions quoted as A1-A4 as reported in Figure S4**

**a) Pd(DABA)Cl<sub>2</sub>**

**NTOo**

**NTOv**

A1  
445 nm

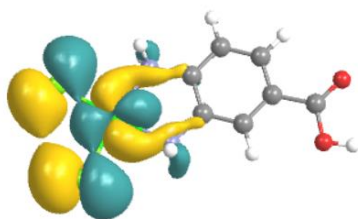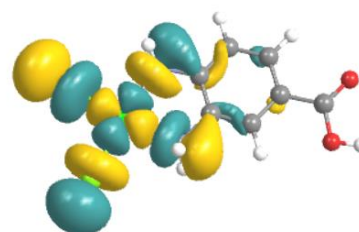

A2  
329 nm

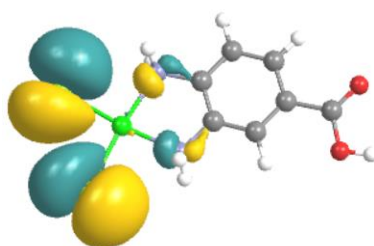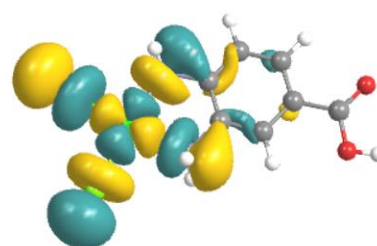

A3  
232 nm

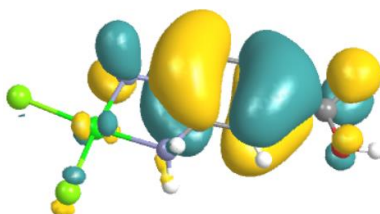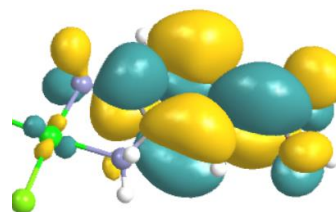

b)  $\text{Pd}(\text{CPDA})\text{Cl}_2$

NTOo

NTOv

A1  
450 nm

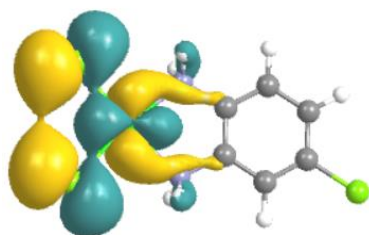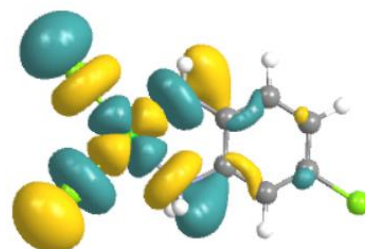

A2  
331 nm

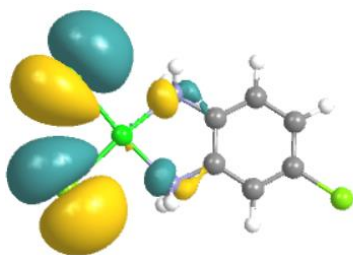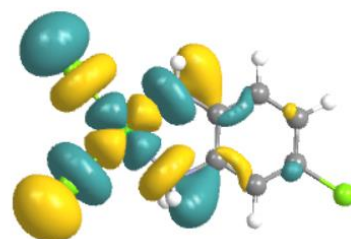

A3  
216 nm

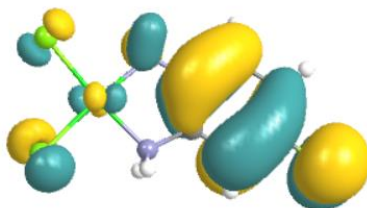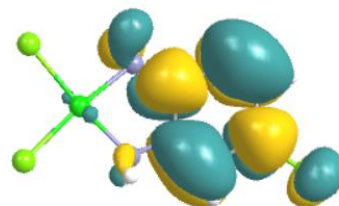

c)  $\text{Pd}(\text{hzpy})\text{Cl}_2$

NTOo

NTOv

A1  
440 nm

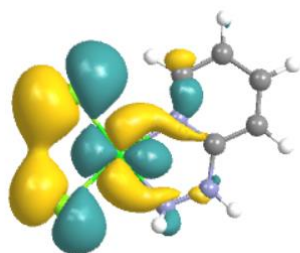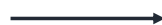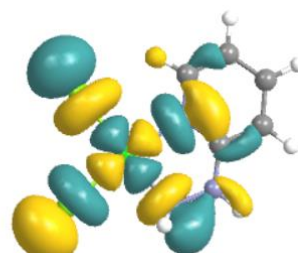

A2  
334 nm

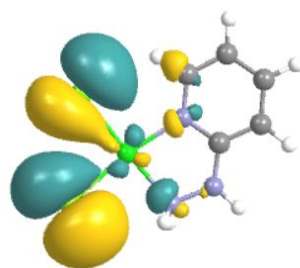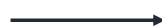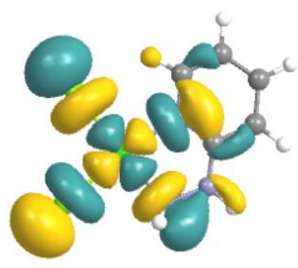

A3  
280 nm

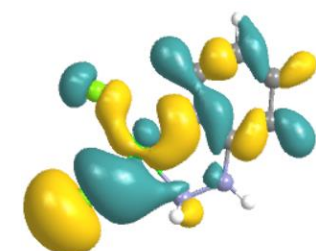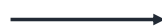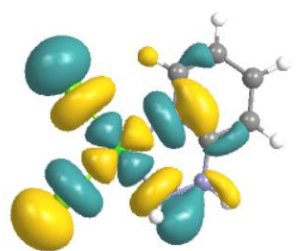

A4  
223 nm

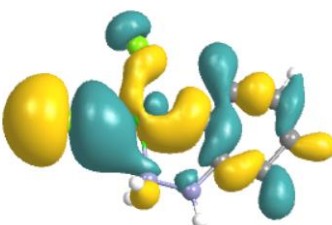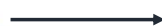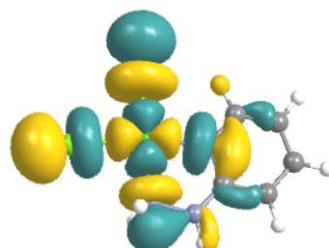

-Figure S6-

Optimized structures for the first and second hydrolysis processes of a) [Pd(DABA)Cl<sub>2</sub>]; b) [Pd(CPDA)Cl<sub>2</sub>]; c) [Pd(hzpy)Cl<sub>2</sub>] complexes, in water phase, at B3LYP/ 6-31+G(d,p)/SDD level of theory

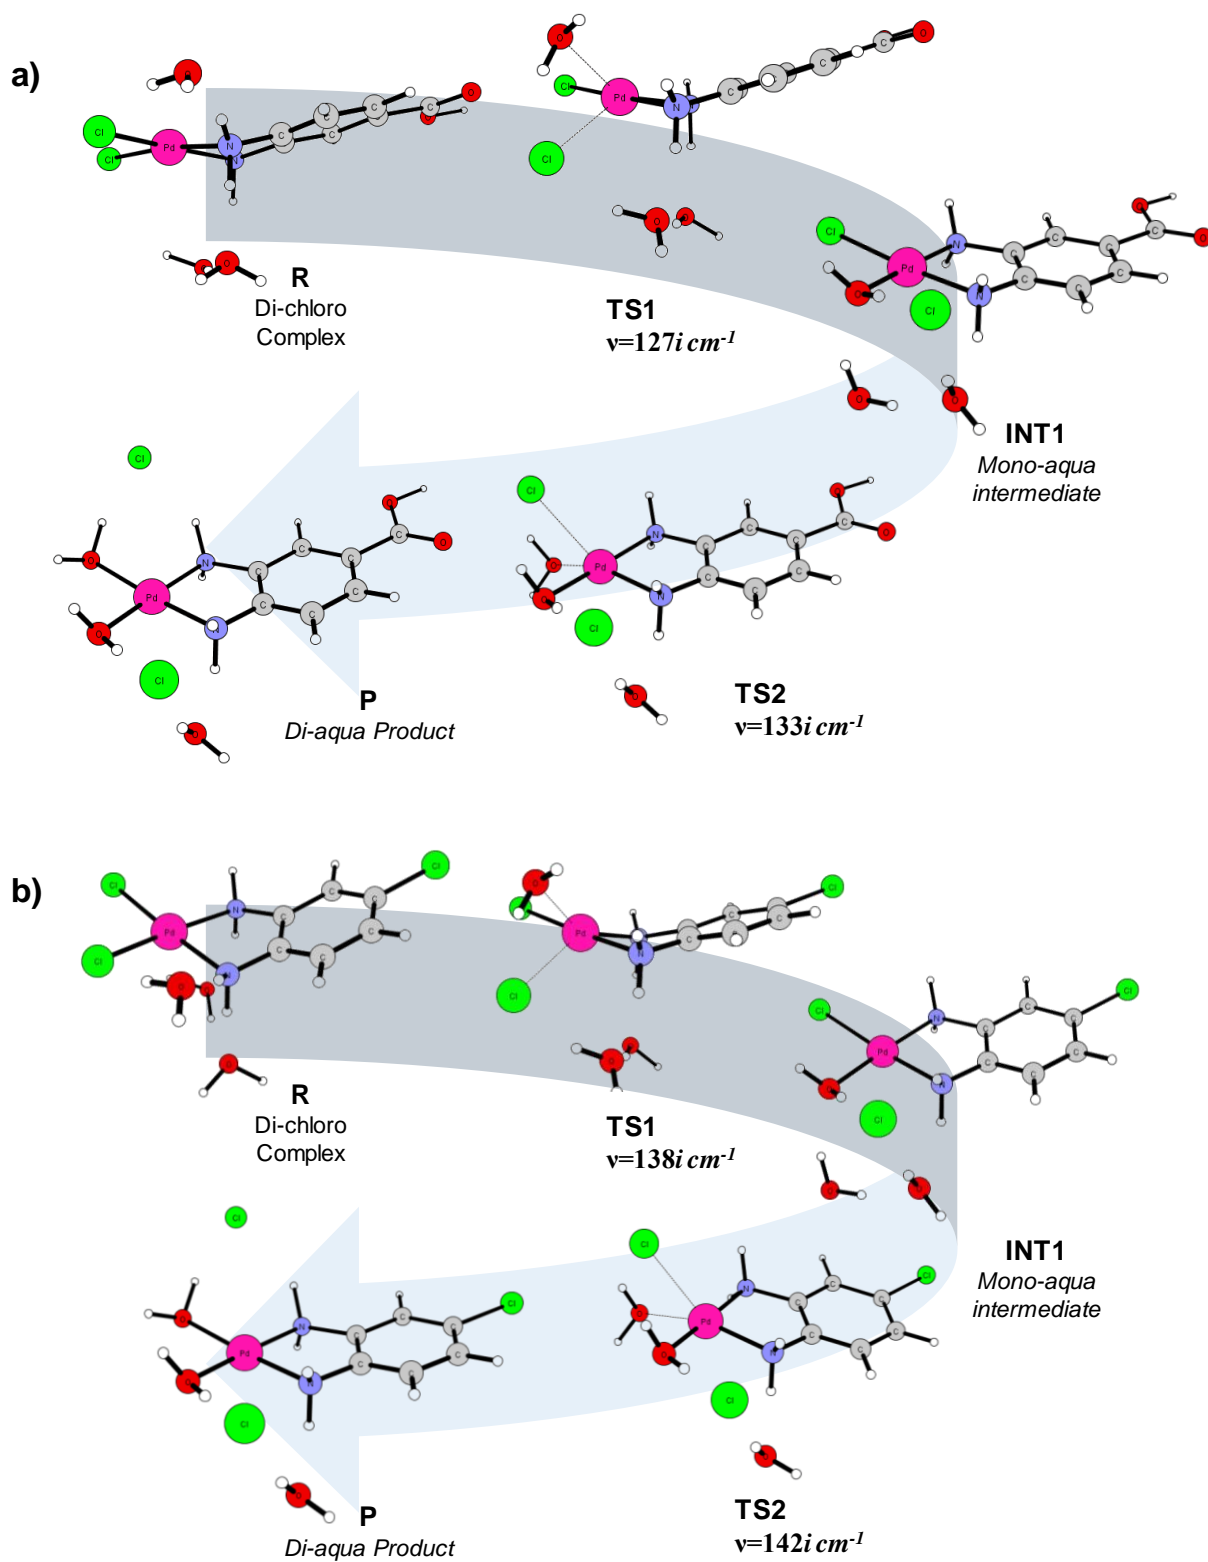

c)

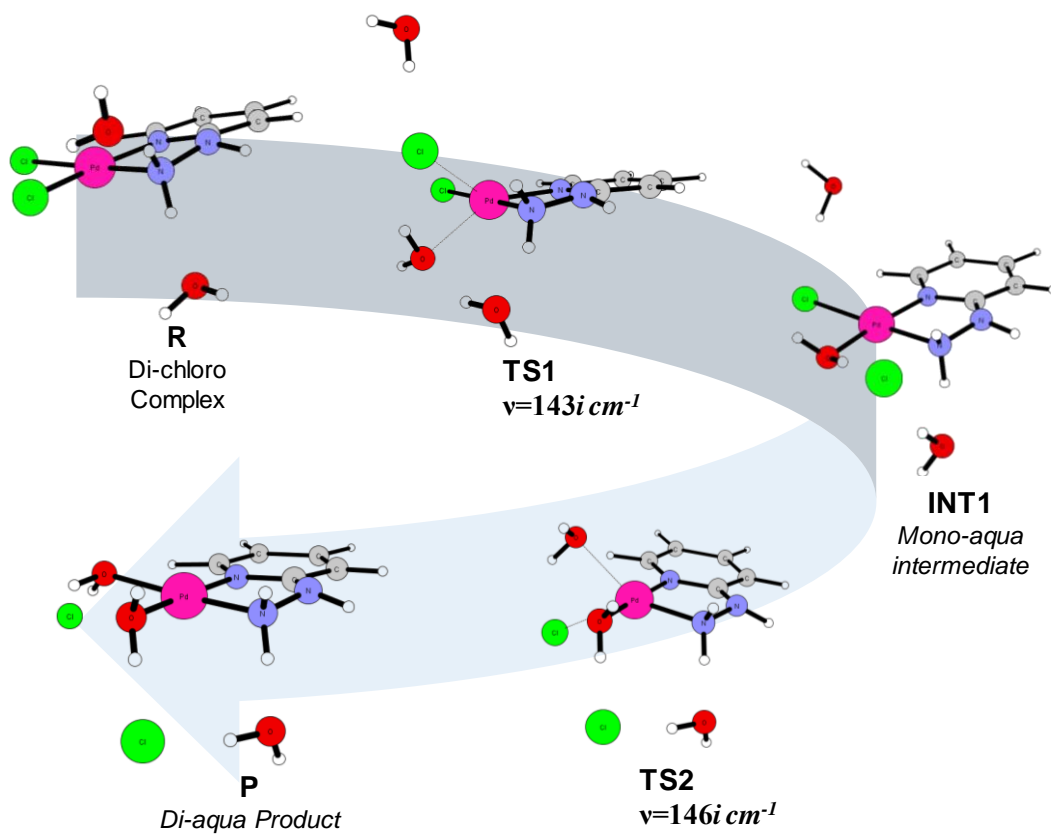

**-Table S1-**

**Selected bond lengths and angles for a) [Pd(DABA)Cl<sub>2</sub>]; b) [Pd(CPDA)Cl<sub>2</sub>]; c) [Pd(hzpy)Cl<sub>2</sub>] optimized complexes and d) structures with numbering**

**a)**

| Bond length | Å    | NBO       | Bond angles | degree |
|-------------|------|-----------|-------------|--------|
| Pd-N1       | 2.08 | Pd 0.34   | N1-Pd-Cl1   | 90.80  |
| Pd-N2       | 2.08 | Cl1 -0.49 | N1-Pd-Cl2   | 174.21 |
| Pd-Cl1      | 2.34 | Cl2 -0.49 | N1-Pd-N2    | 83.08  |
| Pd-Cl2      | 2.34 | N1 -0.82  | N2-Pd-Cl1   | 173.87 |
|             |      | N1 -0.81  | N2-Pd-Cl2   | 91.14  |
|             |      |           | Cl1-Pd-Cl2  | 94.99  |

**b)**

| Bond length | Å    | NBO      | Bond angles | degree |
|-------------|------|----------|-------------|--------|
| Pd-N1       | 2.08 | Pd0.34   | N1Pd-Cl1    | 91.02  |
| Pd-N2       | 2.08 | N1-0.81  | N1Pd-Cl2    | 174.39 |
| Pd-Cl1      | 2.35 | N2 -0.81 | N1-Pd-N2    | 83.13  |
| PdCl2       | 2.35 | Cl1-0.49 | N2-Pd-Cl1   | 174.14 |
|             |      | Cl2-0.49 | N2-Pd-Cl2   | 91.27  |
|             |      |          | Cl1-Pd-Cl2  | 94.59  |

**c)**

| Bond length | Å    | NBO       | Bond angles | degree |
|-------------|------|-----------|-------------|--------|
| Pd-N1       | 2.05 | Pd 0.39   | N1-Pd-Cl1   | 95.44  |
| Pd-N2       | 2.07 | N1 -0.61  | N1-Pd-Cl2   | 171.16 |
| Pd-Cl1      | 2.34 | N2 -0.52  | N1-Pd-N2    | 81.03  |
| Pd-Cl2      | 2.35 | Cl1 -0.49 | N2-Pd-Cl1   | 176.47 |
|             |      | Cl2 -0.48 | N2-Pd-Cl2   | 90.13  |
|             |      |           | Cl1-Pd-Cl2  | 93.40  |

**d)**

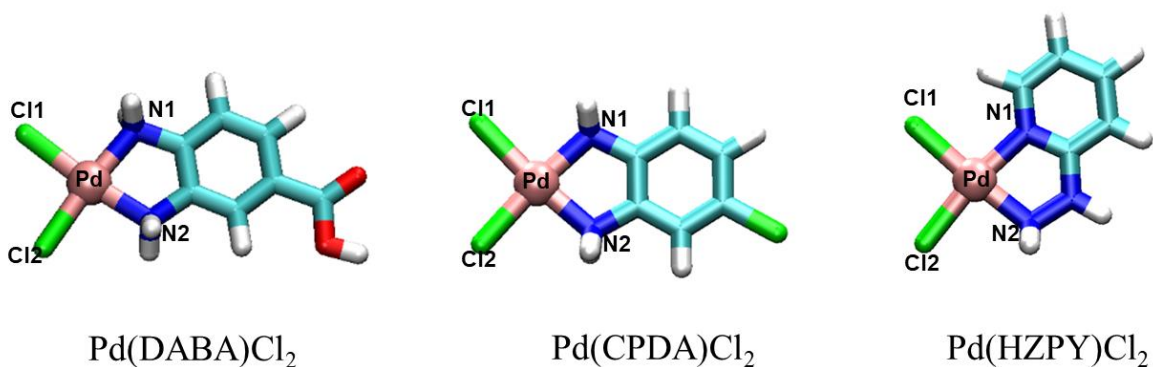

Table S2-

Cartesian coordinates of all the intermediates and transition states located along the hydrolysis free energy profiles for a) [Pd(DABA)Cl<sub>2</sub>]; b) [Pd(CPDA)Cl<sub>2</sub>]; c) [Pd(hzpy)Cl<sub>2</sub>]

a) [Pd(DABA)Cl<sub>2</sub>];R

|    |           |           |           |
|----|-----------|-----------|-----------|
| C  | 0.806340  | -0.127653 | 0.268758  |
| C  | 0.703115  | 1.187407  | -0.193405 |
| C  | 1.845901  | 1.890557  | -0.571490 |
| C  | 3.090317  | 1.275179  | -0.469727 |
| C  | 3.196321  | -0.032720 | 0.016229  |
| C  | 2.045858  | -0.741835 | 0.386557  |
| H  | 1.757558  | 2.904303  | -0.943010 |
| H  | 3.993275  | 1.796996  | -0.760556 |
| H  | 2.122434  | -1.759846 | 0.746526  |
| N  | -0.625466 | 1.763764  | -0.252877 |
| H  | -0.823032 | 2.259688  | 0.631027  |
| H  | -0.750521 | 2.410531  | -1.055448 |
| N  | -0.436675 | -0.806239 | 0.592672  |
| H  | -0.434123 | -1.774384 | 0.277992  |
| H  | -0.649929 | -0.792815 | 1.611720  |
| C  | 4.552846  | -0.628202 | 0.138985  |
| O  | 4.529575  | -1.888320 | 0.614082  |
| H  | 5.450137  | -2.193203 | 0.671435  |
| O  | 5.584907  | -0.045696 | -0.140518 |
| Pd | -2.036239 | 0.237206  | -0.212055 |
| Cl | -3.741726 | 1.569535  | -1.162318 |
| Cl | -3.444316 | -1.617188 | 0.154813  |
| O  | -1.420274 | 3.227004  | -2.520391 |
| H  | -1.540424 | 4.176043  | -2.387141 |
| H  | -2.296087 | 2.838941  | -2.329217 |
| O  | -1.676751 | -0.377180 | 3.063717  |
| H  | -1.624222 | 0.596317  | 2.959606  |
| H  | -2.501839 | -0.627304 | 2.620704  |
| O  | -1.228296 | 2.357772  | 2.527260  |
| H  | -0.499399 | 2.696706  | 3.064589  |
| H  | -1.967893 | 2.953285  | 2.709136  |

TS1

|   |           |           |           |
|---|-----------|-----------|-----------|
| C | 1.389568  | -0.368045 | -0.354905 |
| C | 1.140680  | 0.992654  | -0.161027 |
| C | 2.177822  | 1.918997  | -0.209553 |
| C | 3.471705  | 1.475167  | -0.471451 |
| C | 3.724149  | 0.114815  | -0.678251 |
| C | 2.677986  | -0.816194 | -0.615325 |
| H | 1.971178  | 2.972730  | -0.060879 |
| H | 4.295130  | 2.175294  | -0.528150 |
| H | 2.871140  | -1.869401 | -0.777221 |
| N | -0.242965 | 1.377436  | 0.073905  |
| H | -0.431429 | 1.485828  | 1.087021  |
| H | -0.454323 | 2.262135  | -0.384725 |
| N | 0.249275  | -1.260386 | -0.254520 |
| H | 0.316058  | -2.050296 | -0.892997 |
| H | 0.142424  | -1.604468 | 0.730987  |

|    |           |           |           |
|----|-----------|-----------|-----------|
| C  | 5.123666  | -0.304673 | -0.961553 |
| O  | 5.237005  | -1.624675 | -1.200975 |
| H  | 6.176617  | -1.805071 | -1.368179 |
| O  | 6.076168  | 0.453175  | -0.979318 |
| Pd | -1.484526 | -0.166183 | -0.552105 |
| Cl | -3.566466 | 0.976728  | 0.825238  |
| Cl | -2.660016 | -2.056302 | -1.251055 |
| O  | -2.806388 | 1.275260  | -2.062106 |
| H  | -2.330800 | 2.079375  | -2.310431 |
| H  | -3.349464 | 1.522690  | -1.287741 |
| O  | -0.249633 | -1.706720 | 2.418459  |
| H  | 0.500808  | -1.901393 | 2.992814  |
| H  | -0.549403 | -0.803066 | 2.668466  |
| O  | -1.118233 | 0.873153  | 2.716494  |
| H  | -1.150006 | 1.380749  | 3.537458  |
| H  | -2.027188 | 0.887566  | 2.340298  |

### INT1

|    |           |           |           |
|----|-----------|-----------|-----------|
| C  | 1.329178  | -0.539127 | 0.155048  |
| C  | 1.069515  | 0.789800  | 0.483634  |
| C  | 2.100019  | 1.730535  | 0.467719  |
| C  | 3.385459  | 1.326140  | 0.127911  |
| C  | 3.646281  | -0.012120 | -0.192111 |
| C  | 2.613286  | -0.954688 | -0.176972 |
| H  | 1.889398  | 2.762953  | 0.720419  |
| H  | 4.203273  | 2.035439  | 0.104352  |
| H  | 2.811696  | -1.989711 | -0.425527 |
| N  | -0.291087 | 1.144379  | 0.844380  |
| H  | -0.358499 | 1.477994  | 1.825781  |
| H  | -0.643880 | 1.930647  | 0.287042  |
| N  | 0.199735  | -1.468076 | 0.169735  |
| H  | 0.100142  | -1.943009 | -0.728327 |
| H  | 0.333100  | -2.198884 | 0.870542  |
| C  | 5.042078  | -0.388950 | -0.546321 |
| O  | 5.173548  | -1.695183 | -0.840406 |
| H  | 6.107737  | -1.847200 | -1.058096 |
| O  | 5.973609  | 0.393515  | -0.572512 |
| Pd | -1.543157 | -0.488082 | 0.575458  |
| Cl | -2.820948 | -2.397244 | 0.144764  |
| O  | -3.305171 | 0.542891  | 1.016959  |
| H  | -3.214162 | 1.535157  | 0.849000  |
| H  | -4.017485 | 0.198150  | 0.457204  |
| Cl | -2.688632 | 3.415544  | 0.728504  |
| O  | -1.173227 | 2.317721  | 3.231252  |
| H  | -0.705728 | 2.913588  | 3.829625  |
| H  | -1.707610 | 2.885861  | 2.632345  |
| O  | -2.642320 | -0.012049 | 3.816671  |
| H  | -2.125891 | 0.814831  | 3.774251  |
| H  | -3.127864 | 0.007427  | 2.979970  |

### TS2

|   |          |           |           |
|---|----------|-----------|-----------|
| C | 1.281990 | -0.522931 | 0.216082  |
| C | 1.031545 | 0.819650  | 0.489496  |
| C | 2.071567 | 1.749149  | 0.444994  |
| C | 3.355295 | 1.317845  | 0.131415  |
| C | 3.604830 | -0.033763 | -0.139042 |
| C | 2.561686 | -0.964395 | -0.097597 |



|    |           |           |           |
|----|-----------|-----------|-----------|
| H  | 1.871594  | 2.792840  | 0.657623  |
| H  | 4.180504  | 2.017598  | 0.091583  |
| H  | 2.749390  | -2.010155 | -0.307177 |
| N  | -0.326022 | 1.197752  | 0.832331  |
| H  | -0.399980 | 1.610492  | 1.791529  |
| H  | -0.697989 | 1.925221  | 0.212316  |
| N  | 0.141917  | -1.436931 | 0.271248  |
| H  | 0.000058  | -1.907705 | -0.624679 |
| H  | 0.276612  | -2.168692 | 0.972485  |
| C  | 4.999407  | -0.440513 | -0.464593 |
| O  | 5.111568  | -1.753606 | -0.735796 |
| H  | 6.046450  | -1.927248 | -0.933465 |
| O  | 5.945360  | 0.324507  | -0.488779 |
| Pd | -1.569396 | -0.460225 | 0.742670  |
| Cl | -3.330356 | -1.712183 | -0.950813 |
| O  | -3.330814 | 0.539715  | 1.180700  |
| H  | -3.244181 | 1.524389  | 0.985028  |
| H  | -3.913856 | 0.155874  | 0.496314  |
| Cl | -2.751832 | 3.413919  | 0.684514  |
| O  | -1.108622 | 2.435728  | 3.169377  |
| H  | -0.521165 | 3.091656  | 3.565758  |
| H  | -1.704946 | 2.947084  | 2.580611  |
| O  | -2.227422 | -2.560599 | 1.666048  |
| H  | -2.732406 | -2.463991 | 2.484857  |
| H  | -2.882485 | -2.709554 | 0.952743  |

# **P**

|    |           |           |           |
|----|-----------|-----------|-----------|
| C  | 1.197842  | -0.508199 | 0.168310  |
| C  | 0.972782  | 0.830340  | 0.480144  |
| C  | 2.012659  | 1.757055  | 0.410851  |
| C  | 3.280492  | 1.324043  | 0.039545  |
| C  | 3.511377  | -0.024930 | -0.257961 |
| C  | 2.464396  | -0.950919 | -0.193555 |
| H  | 1.828092  | 2.798028  | 0.648689  |
| H  | 4.107695  | 2.019471  | -0.025868 |
| H  | 2.638057  | -1.994230 | -0.424921 |
| N  | -0.367403 | 1.201498  | 0.900086  |
| H  | -0.410372 | 1.459030  | 1.916689  |
| H  | -0.711435 | 2.039928  | 0.416599  |
| N  | 0.053083  | -1.409202 | 0.242416  |
| H  | -0.109225 | -1.939669 | -0.637891 |
| H  | 0.189287  | -2.104773 | 0.978295  |
| C  | 4.890813  | -0.430980 | -0.643414 |
| O  | 4.990541  | -1.741842 | -0.929817 |
| H  | 5.916072  | -1.913905 | -1.168687 |
| O  | 5.836413  | 0.333154  | -0.697749 |
| Pd | -1.658316 | -0.353082 | 0.610697  |
| Cl | -1.323248 | -3.180205 | -2.007835 |
| O  | -3.367515 | 0.784930  | 1.012211  |
| H  | -3.155757 | 1.773118  | 1.043031  |
| H  | -4.029557 | 0.685089  | 0.312114  |
| Cl | -2.555998 | 3.632979  | 1.080044  |
| O  | -1.062763 | 2.145445  | 3.388709  |
| H  | -0.412838 | 2.666248  | 3.877418  |
| H  | -1.596189 | 2.801948  | 2.891125  |
| O  | -2.821145 | -2.059257 | 0.265960  |
| H  | -3.753821 | -1.868762 | 0.090563  |

|   |           |           |           |
|---|-----------|-----------|-----------|
| H | -2.445876 | -2.511400 | -0.558829 |
|---|-----------|-----------|-----------|

**b) [Pd(CPDA)Cl<sub>2</sub>];**

**R**

|    |           |           |           |
|----|-----------|-----------|-----------|
| C  | 0.818010  | -0.152967 | 0.280986  |
| C  | 0.704995  | 1.158195  | -0.184700 |
| C  | 1.845975  | 1.864396  | -0.558953 |
| C  | 3.101203  | 1.257784  | -0.469344 |
| C  | 3.193726  | -0.048503 | 0.009667  |
| C  | 2.061492  | -0.767891 | 0.395339  |
| H  | 1.758258  | 2.877790  | -0.932507 |
| H  | 3.991368  | 1.793503  | -0.773276 |
| H  | 2.141598  | -1.786016 | 0.754863  |
| N  | -0.632971 | 1.716875  | -0.263831 |
| H  | -0.852990 | 2.210863  | 0.613355  |
| H  | -0.741292 | 2.381015  | -1.045356 |
| N  | -0.419625 | -0.840068 | 0.607223  |
| H  | -0.390668 | -1.823142 | 0.342713  |
| H  | -0.644505 | -0.787643 | 1.618283  |
| Pd | -2.006826 | 0.145893  | -0.294742 |
| Cl | -3.707017 | 1.413853  | -1.347618 |
| Cl | -3.362541 | -1.760035 | -0.019123 |
| O  | -1.489990 | 3.381806  | -2.467449 |
| H  | -1.630834 | 4.332393  | -2.375193 |
| H  | -2.355734 | 2.962008  | -2.295695 |
| O  | -1.692889 | -0.314006 | 3.110862  |
| H  | -1.633296 | 0.658120  | 3.008272  |
| H  | -2.539866 | -0.565889 | 2.714536  |
| O  | -1.214701 | 2.431065  | 2.569310  |
| H  | -0.467056 | 2.768764  | 3.081985  |
| H  | -1.936139 | 3.054175  | 2.733763  |
| Cl | 4.768602  | -0.816010 | 0.121867  |

**TS1**

|    |           |           |           |
|----|-----------|-----------|-----------|
| C  | 1.401241  | -0.376348 | -0.373837 |
| C  | 1.152548  | 0.979139  | -0.158951 |
| C  | 2.195747  | 1.899480  | -0.195793 |
| C  | 3.493974  | 1.463080  | -0.471447 |
| C  | 3.721376  | 0.106734  | -0.701021 |
| C  | 2.688263  | -0.830077 | -0.648923 |
| H  | 1.999547  | 2.953095  | -0.031227 |
| H  | 4.311819  | 2.170178  | -0.522157 |
| H  | 2.879247  | -1.880377 | -0.831358 |
| N  | -0.234274 | 1.364245  | 0.072988  |
| H  | -0.419989 | 1.489565  | 1.080286  |
| H  | -0.448571 | 2.242850  | -0.396707 |
| N  | 0.262339  | -1.272419 | -0.283211 |
| H  | 0.329833  | -2.054885 | -0.931568 |
| H  | 0.170266  | -1.632266 | 0.688505  |
| Pd | -1.467832 | -0.174053 | -0.586759 |
| Cl | -3.608491 | 0.857642  | 0.825844  |

|    |           |           |           |
|----|-----------|-----------|-----------|
| Cl | -2.619886 | -2.052089 | -1.354587 |
| O  | -2.806920 | 1.308240  | -2.038420 |
| H  | -2.368557 | 2.122107  | -2.321842 |
| H  | -3.386988 | 1.554294  | -1.292036 |
| O  | -0.164924 | -1.654131 | 2.487060  |
| H  | 0.533540  | -1.869068 | 3.116977  |
| H  | -0.504688 | -0.767414 | 2.738507  |
| O  | -1.206952 | 0.915811  | 2.776893  |
| H  | -1.256960 | 1.426401  | 3.595248  |
| H  | -2.101389 | 0.939015  | 2.366085  |
| Cl | 5.342983  | -0.441896 | -1.083134 |

### **INT1**

|    |           |           |           |
|----|-----------|-----------|-----------|
| C  | 1.385224  | -0.569097 | 0.077145  |
| C  | 1.111991  | 0.729255  | 0.497794  |
| C  | 2.129740  | 1.683257  | 0.518860  |
| C  | 3.419154  | 1.332263  | 0.123568  |
| C  | 3.673521  | 0.022218  | -0.286882 |
| C  | 2.669592  | -0.943583 | -0.313665 |
| H  | 1.914472  | 2.695726  | 0.838348  |
| H  | 4.214574  | 2.066665  | 0.130520  |
| H  | 2.879729  | -1.955364 | -0.636525 |
| N  | -0.251749 | 1.042431  | 0.894879  |
| H  | -0.310422 | 1.307252  | 1.889419  |
| H  | -0.620760 | 1.854882  | 0.387874  |
| N  | 0.277126  | -1.523617 | 0.067251  |
| H  | 0.190468  | -1.982884 | -0.840494 |
| H  | 0.430971  | -2.264606 | 0.753567  |
| Pd | -1.479574 | -0.587366 | 0.519235  |
| Cl | -2.752172 | -2.471690 | -0.018266 |
| O  | -3.239503 | 0.424122  | 1.042189  |
| H  | -3.174693 | 1.414002  | 0.868390  |
| H  | -3.975733 | 0.067447  | 0.520407  |
| Cl | -2.668424 | 3.333222  | 0.745075  |
| O  | -1.182127 | 2.373861  | 3.319647  |
| H  | -0.731564 | 2.976761  | 3.924674  |
| H  | -1.653423 | 2.929975  | 2.659377  |
| O  | -3.136030 | 0.452967  | 4.020498  |
| H  | -2.439948 | 1.132947  | 3.934489  |
| H  | -3.364357 | 0.250716  | 3.099929  |
| Cl | 5.295976  | -0.423372 | -0.778592 |

### **TS2**

|   |          |           |           |
|---|----------|-----------|-----------|
| C | 1.264715 | -0.539653 | 0.214680  |
| C | 1.005813 | 0.797594  | 0.493700  |
| C | 2.047627 | 1.725765  | 0.483121  |
| C | 3.344677 | 1.306783  | 0.191120  |
| C | 3.581437 | -0.040642 | -0.088989 |
| C | 2.553240 | -0.980416 | -0.080689 |
| H | 1.847101 | 2.768475  | 0.701272  |
| H | 4.161324 | 2.017222  | 0.179078  |

|    |           |           |           |
|----|-----------|-----------|-----------|
| H  | 2.749174  | -2.022304 | -0.301629 |
| N  | -0.363752 | 1.176233  | 0.806332  |
| H  | -0.424425 | 1.618802  | 1.745707  |
| H  | -0.716432 | 1.882266  | 0.155742  |
| N  | 0.128540  | -1.458391 | 0.237742  |
| H  | 0.009367  | -1.920114 | -0.666419 |
| H  | 0.254203  | -2.197058 | 0.933901  |
| Pd | -1.593083 | -0.493862 | 0.693278  |
| Cl | -3.327828 | -1.733654 | -1.068675 |
| O  | -3.369659 | 0.479094  | 1.131086  |
| H  | -3.312009 | 1.481127  | 1.057021  |
| H  | -3.950529 | 0.158061  | 0.415024  |
| Cl | -2.983572 | 3.432461  | 0.996842  |
| O  | -0.836242 | 2.699114  | 3.149699  |
| H  | -0.182964 | 3.379458  | 3.357067  |
| H  | -1.543108 | 3.145721  | 2.633674  |
| O  | -2.259279 | -2.634666 | 1.554569  |
| H  | -2.747150 | -2.596981 | 2.388696  |
| H  | -2.917841 | -2.783007 | 0.845338  |
| Cl | 5.208701  | -0.565477 | -0.472949 |

## **P**

|    |           |           |           |
|----|-----------|-----------|-----------|
| C  | 1.184566  | -0.517705 | 0.152673  |
| C  | 0.951486  | 0.809348  | 0.496229  |
| C  | 1.994156  | 1.734775  | 0.473058  |
| C  | 3.275862  | 1.319448  | 0.114966  |
| C  | 3.493334  | -0.020118 | -0.213260 |
| C  | 2.459815  | -0.954620 | -0.200754 |
| H  | 1.809890  | 2.770084  | 0.735152  |
| H  | 4.095499  | 2.026027  | 0.091705  |
| H  | 2.640660  | -1.989052 | -0.463361 |
| N  | -0.400943 | 1.173410  | 0.899092  |
| H  | -0.429065 | 1.443968  | 1.903721  |
| H  | -0.735864 | 2.002939  | 0.399035  |
| N  | 0.043746  | -1.425090 | 0.187488  |
| H  | -0.094130 | -1.939543 | -0.702805 |
| H  | 0.172041  | -2.134631 | 0.911875  |
| Pd | -1.676140 | -0.387650 | 0.566711  |
| Cl | -1.309165 | -3.279242 | -2.073817 |
| O  | -3.403570 | 0.720384  | 0.986136  |
| H  | -3.230273 | 1.709758  | 1.078926  |
| H  | -4.072728 | 0.633216  | 0.291021  |
| Cl | -2.730194 | 3.599605  | 1.248105  |
| O  | -0.844564 | 2.394750  | 3.419956  |
| H  | -0.182114 | 2.972077  | 3.820052  |
| H  | -1.465623 | 2.981059  | 2.934903  |
| O  | -2.825439 | -2.099071 | 0.180583  |
| H  | -3.762405 | -1.926431 | 0.008585  |
| H  | -2.447496 | -2.566253 | -0.630005 |
| Cl | 5.105137  | -0.541890 | -0.662985 |

**c) [Pd(hzpy)Cl<sub>2</sub>]**

**R**

|    |           |           |           |
|----|-----------|-----------|-----------|
| C  | -2.816467 | 1.150373  | 0.386899  |
| C  | -2.156821 | -0.858254 | -0.619676 |
| C  | -3.489081 | -1.159640 | -0.954945 |
| C  | -4.479319 | -0.257893 | -0.607471 |
| C  | -4.142734 | 0.923321  | 0.073079  |
| H  | -2.481262 | 2.033422  | 0.914386  |
| H  | -3.714045 | -2.081422 | -1.476099 |
| H  | -5.512151 | -0.470951 | -0.857247 |
| H  | -4.894123 | 1.648023  | 0.356673  |
| N  | -1.839491 | 0.276868  | 0.048803  |
| N  | -1.113982 | -1.664208 | -1.003115 |
| H  | -1.330999 | -2.631385 | -1.212384 |
| N  | 0.130332  | -1.467628 | -0.329411 |
| H  | 0.898623  | -1.556006 | -1.012587 |
| H  | 0.242292  | -2.177771 | 0.417098  |
| Pd | 0.149221  | 0.419819  | 0.497439  |
| Cl | -0.007861 | 2.592761  | 1.414897  |
| Cl | 2.487487  | 0.281900  | 0.879262  |
| O  | 2.903791  | 2.880077  | 2.831413  |
| H  | 3.139604  | 2.055029  | 2.377349  |
| H  | 1.990381  | 3.017728  | 2.524129  |
| O  | 2.621191  | -1.497581 | -1.767129 |
| H  | 2.919367  | -0.840131 | -1.111651 |
| H  | 2.799433  | -1.112020 | -2.634286 |
| O  | 0.254625  | -3.449304 | 1.725400  |
| H  | 0.393212  | -4.375428 | 1.487571  |
| H  | 0.870421  | -3.273811 | 2.448972  |

**TS1**

|    |           |           |           |
|----|-----------|-----------|-----------|
| C  | -3.232646 | 2.227018  | -0.032609 |
| C  | -3.371467 | -0.113238 | 0.021373  |
| C  | -4.753100 | -0.064156 | -0.233099 |
| C  | -5.354120 | 1.172159  | -0.388630 |
| C  | -4.586130 | 2.343297  | -0.285770 |
| H  | -2.577064 | 3.081812  | 0.062242  |
| H  | -5.316707 | -0.985693 | -0.302491 |
| H  | -6.418590 | 1.229556  | -0.583839 |
| H  | -5.027575 | 3.324126  | -0.402499 |
| N  | -2.635180 | 1.021079  | 0.116222  |
| N  | -2.697632 | -1.303450 | 0.125337  |
| H  | -3.223305 | -2.135179 | 0.363223  |
| N  | -1.373536 | -1.251797 | 0.644239  |
| H  | -0.758264 | -1.820607 | 0.059558  |
| H  | -1.319710 | -1.576786 | 1.630057  |
| Pd | -0.679905 | 0.673007  | 0.566581  |
| Cl | 0.046052  | 2.892888  | 0.491702  |
| Cl | 1.609172  | -0.565143 | -0.548863 |
| O  | 1.022066  | 0.255851  | 2.248451  |

|   |           |           |           |
|---|-----------|-----------|-----------|
| H | 1.659499  | -0.073571 | 1.578936  |
| H | 1.336926  | 1.127390  | 2.530039  |
| O | 2.241082  | -0.177522 | -3.672524 |
| H | 2.079217  | -0.280664 | -2.714355 |
| O | -0.599479 | -1.735761 | 3.323380  |
| H | -1.128839 | -1.545816 | 4.107539  |
| H | 0.042161  | -1.003721 | 3.236938  |
| H | 3.192993  | -0.287411 | -3.782883 |

### INT1

|    |           |           |           |
|----|-----------|-----------|-----------|
| C  | -3.277854 | 1.260277  | 1.651660  |
| C  | -3.312569 | -0.181290 | -0.198392 |
| C  | -4.648512 | -0.530172 | 0.065726  |
| C  | -5.283499 | 0.049745  | 1.148978  |
| C  | -4.591448 | 0.965092  | 1.958631  |
| H  | -2.685609 | 1.949810  | 2.236256  |
| H  | -5.150809 | -1.241814 | -0.576876 |
| H  | -6.313106 | -0.207936 | 1.368536  |
| H  | -5.061445 | 1.435943  | 2.811472  |
| N  | -2.646733 | 0.697153  | 0.592361  |
| N  | -2.640447 | -0.665238 | -1.290735 |
| H  | -2.975539 | -1.521644 | -1.714427 |
| N  | -1.226049 | -0.505372 | -1.294248 |
| H  | -0.914665 | -0.230650 | -2.231041 |
| H  | -0.737013 | -1.392001 | -1.074168 |
| Pd | -0.719306 | 0.969478  | 0.064459  |
| Cl | -0.201286 | 2.679565  | 1.597113  |
| Cl | 1.500023  | -0.261809 | -3.193809 |
| O  | 1.272322  | 1.092911  | -0.552850 |
| H  | 1.423565  | 0.757882  | -1.487754 |
| H  | 1.588757  | 2.006864  | -0.492921 |
| O  | 0.606438  | -2.683139 | -1.410575 |
| H  | 1.090116  | -2.075437 | -2.011802 |
| O  | -2.829312 | 4.599510  | 1.419016  |
| H  | -2.631598 | 5.538736  | 1.516444  |
| H  | 1.225947  | -2.913357 | -0.707074 |
| H  | -1.966412 | 4.148519  | 1.440519  |

### TS2

|   |           |           |           |
|---|-----------|-----------|-----------|
| C | -3.169018 | 1.044468  | 1.808384  |
| C | -3.344144 | -0.105527 | -0.235644 |
| C | -4.627883 | -0.566888 | 0.106024  |
| C | -5.163311 | -0.190514 | 1.324223  |
| C | -4.430080 | 0.635327  | 2.193444  |
| H | -2.534509 | 1.660664  | 2.430526  |
| H | -5.169177 | -1.199365 | -0.585476 |
| H | -6.151035 | -0.537647 | 1.603298  |
| H | -4.827720 | 0.943634  | 3.150775  |
| N | -2.638826 | 0.675600  | 0.618370  |
| N | -2.767072 | -0.369593 | -1.446150 |
| H | -3.082732 | -1.175296 | -1.971855 |
| N | -1.388677 | -0.043929 | -1.594794 |
| H | -1.276071 | 0.450690  | -2.479219 |

|    |           |           |           |
|----|-----------|-----------|-----------|
| H  | -0.801608 | -0.908910 | -1.612970 |
| Pd | -0.816601 | 1.166826  | 0.000271  |
| Cl | 0.296574  | 0.945057  | 2.536129  |
| Cl | 2.861709  | -0.713764 | -0.973644 |
| O  | 1.080131  | 1.655941  | -0.708035 |
| H  | 1.691272  | 0.856269  | -0.789908 |
| H  | 1.067100  | 2.082827  | -1.577118 |
| O  | 0.282907  | -2.263455 | -1.735475 |
| H  | 1.158196  | -1.893993 | -1.468776 |
| O  | -0.847123 | 3.280340  | 1.119018  |
| H  | -0.287363 | 3.912027  | 0.645986  |
| H  | 0.110328  | -3.007526 | -1.144942 |
| H  | -0.306368 | 2.928117  | 1.858753  |

# P

|    |           |           |           |
|----|-----------|-----------|-----------|
| C  | -3.043330 | 0.866627  | 1.876262  |
| C  | -3.341844 | -0.043389 | -0.267775 |
| C  | -4.633615 | -0.483050 | 0.066635  |
| C  | -5.111960 | -0.218491 | 1.337618  |
| C  | -4.307024 | 0.465682  | 2.263115  |
| H  | -2.364747 | 1.364634  | 2.558798  |
| H  | -5.223510 | -1.016476 | -0.667362 |
| H  | -6.104675 | -0.552010 | 1.615828  |
| H  | -4.651032 | 0.674817  | 3.266644  |
| N  | -2.573329 | 0.622488  | 0.628949  |
| N  | -2.812266 | -0.216651 | -1.519912 |
| H  | -3.183134 | -0.964081 | -2.094685 |
| N  | -1.404609 | -0.011313 | -1.646086 |
| H  | -1.244511 | 0.493604  | -2.517935 |
| H  | -0.887482 | -0.923539 | -1.689537 |
| Pd | -0.744243 | 1.090735  | -0.062680 |
| Cl | -0.351408 | 1.455640  | 4.320081  |
| Cl | 2.818361  | -0.876747 | -1.313645 |
| O  | 1.158775  | 1.534314  | -0.817270 |
| H  | 1.731458  | 0.718997  | -0.993096 |
| H  | 1.148773  | 2.056418  | -1.633332 |
| O  | 0.126502  | -2.303894 | -1.902897 |
| H  | 1.033689  | -1.972118 | -1.699606 |
| O  | -0.121473 | 2.301927  | 1.513429  |
| H  | 0.808779  | 2.515216  | 1.338094  |
| H  | -0.030514 | -3.048966 | -1.309245 |
| H  | -0.171594 | 1.962864  | 2.469080  |
